# Supplementary material
Source: ML conference proceedings conference paper supplement (https://proceedings.neurips.cc/paper_files/paper/2013/hash/68053af2923e00204c3ca7c6a3150cf7-Abstract.html)
Supplement: Supplementary file [file 68053af2923e00204c3ca7c6a3150cf7-Supplemental.zip]

*Proof of Lemma 1.* We start with expanding  $D(\mathbf{q}_t \parallel \mathbf{q}_{t+1})$ :

$$\begin{aligned}
D(\mathbf{q}_t \parallel \mathbf{q}_{t+1}) &= \sum_{x,a} \mathbf{q}_t(x,a) \ln \frac{\mathbf{q}_t(x,a)}{\mathbf{q}_{t+1}(x,a)} \\
&= \sum_{x,a} \mathbf{q}_t(x,a) \ln \frac{\mathbf{Z}_t(\hat{\mathbf{v}}_t, k)}{e^{\delta(x,a|\hat{\mathbf{v}}_t, \hat{\ell}_t)}} \\
&= \sum_{k=0}^{L-1} \ln \mathbf{Z}_t(\hat{\mathbf{v}}_t, k) - \sum_{x,a} \mathbf{q}_t(x,a) \delta(x,a|\hat{\mathbf{v}}_t, \hat{\ell}_t). \tag{1}
\end{aligned}$$

By Proposition 1, we have that

$$\begin{aligned}
\sum_{k=0}^{L-1} \ln \mathbf{Z}_t(\hat{\mathbf{v}}_t, k) &\leq \sum_{k=0}^{L-1} \ln \mathbf{Z}_t(0, k) = \sum_{k=0}^{L-1} \ln \sum_{x \in \mathcal{X}_k} \sum_a \mathbf{q}_t(x,a) e^{-\eta \hat{\ell}_t(x,a)} \\
&\leq \sum_{k=0}^{L-1} \ln \left( 1 - \eta \sum_{x \in \mathcal{X}_k} \sum_a \mathbf{q}_t(x,a) \hat{\ell}_t(x,a) + \sum_{x \in \mathcal{X}_k} \sum_a \mathbf{q}_t(x,a) \frac{(-\eta \hat{\ell}_t(x,a))^2}{2} \right) \\
&\leq -\eta \sum_{x,a} \mathbf{q}_t(x,a) \hat{\ell}_t(x,a) + \sum_{x,a} \mathbf{q}_t(x,a) \frac{(-\eta \hat{\ell}_t(x,a))^2}{2}
\end{aligned}$$

where we used the facts that  $e^s \leq 1 + s + \frac{s^2}{2}$  holds for all  $s \leq 0$  and  $\log(1 + s) \leq s$  holds for all  $s \in \mathbb{R}$ .

The second term in (1) is rewritten as follows:

$$\begin{aligned}
\sum_{x,a} \mathbf{q}_t(x,a) \delta(x,a|\hat{\mathbf{v}}_t, \hat{\ell}_t) &= -\eta \sum_{x,a} \mathbf{q}_t(x,a) \hat{\ell}_t(x,a) \\
&\quad + \sum_{x,a} \mathbf{q}_t(x,a) \hat{\mathbf{v}}_t(x) - \sum_{x,a} \mathbf{q}_t(x,a) \sum_{x' \in \mathcal{X}_{k(x)+1}} \hat{\mathbf{v}}_t(x') P(x'|x,a).
\end{aligned}$$

By the property of the occupancy measure, we have for all  $k = 0, 1, \dots, L-1$  that

$$\begin{aligned}
\sum_{x \in \mathcal{X}_k} \sum_a \mathbf{q}_t(x,a) \sum_{x' \in \mathcal{X}_{k+1}} \hat{\mathbf{v}}_t(x') P(x'|x,a) &= \sum_{x' \in \mathcal{X}_{k+1}} \hat{\mathbf{v}}_t(x') \sum_{x \in \mathcal{X}_k} \sum_a \mathbf{q}_t(x,a) P(x'|x,a) \\
&= \sum_{x' \in \mathcal{X}_{k+1}} \hat{\mathbf{v}}_t(x') \sum_a \mathbf{q}_t(x',a) \\
&= \sum_{x \in \mathcal{X}_{k+1}} \sum_a \mathbf{q}_t(x,a) \hat{\mathbf{v}}_t(x).
\end{aligned}$$

Since  $\hat{\mathbf{v}}_t(x_0) = \hat{\mathbf{v}}_t(x_L) = 0$ , we have

$$\sum_{x,a} \mathbf{q}_t(x,a) \delta(x,a|\hat{\mathbf{v}}_t, \hat{\ell}_t) = -\eta \sum_{x,a} \mathbf{q}_t(x,a) \hat{\ell}_t(x,a).$$

Combining the obtained expressions for the terms on the right-hand side of (1), we obtain the statement of the lemma as

$$D(\mathbf{q}_t \parallel \mathbf{q}_{t+1}) \leq \frac{\eta^2}{2} \sum_{x,a} \mathbf{q}_t(x,a) \hat{\ell}_t^2(x,a).$$

□
